# Supplementary material for: A Sketch of Language History in the Korean Peninsula
Source: PLoS One. 2015 May 29;10(5):e0128448. doi: 10.1371/journal.pone.0128448 (PMC4449120; doi:10.1371/journal.pone.0128448)
Supplement: S1 Dataset — (XLSX) [file pone.0128448.s001.xlsx]

## Sheet: Raw data
	1	1	2	2	3	3	4	4	5	5	6	6	7	7	8	8	9	9	10	10	11	11	12	12	13	13	14	14	15	15	16	16	17	17	18	18	19	19	20	20	21	21	22	22	23	23	24	24	25
	hand	hand	left	left	right	right	leg	leg	walk	walk	road	road	to come	to come	to turn	to turn	to swim	to swim	dirty	dirty	dust	dust	skin	skin	back	back	belly	belly	bone	bone	intestines	intestines	liver	liver	breast	breast	shoulder	shoulder	to know, be knowledgeable	to know, be knowledgeable	to think	to think	to fear	to fear	blood	blood	head	head	neck
	손	손	왼쪽	왼쪽	오른쪽	오른쪽	다리	다리	걸음	걸음	길	길	오다	오다	돌다	돌다	헤엄치다	헤엄치다	더럽다	더럽다	티끌	티끌	살갗	살갗	등	등	배	배	뼈	뼈	장/애/창자	장/애/창자	간	간	가슴	가슴	어깨	어깨	알다	알다	헤아리다	헤아리다	두려워하다	두려워하다	피	피	머리	머리	목
Jeju	son	1	wen	1	o-rɨn-pen	1	#	#	kər-	1	cil	1	#	#	tol-lin-	1	#	#	#	#	ku-dum	1	#	#	tɨŋ-ə-ri	1	pɛ	1	k'waŋ	1	cʰaŋ-	1	#	#	ka-sim	1	ək-kɛ	1	#	#	he-a-rin-	1	cə-tɨn-	1	#	#	tɛ-gaŋ-i	1	ja-ga-gi
Southern Jeolla	son	1	øn	1	o-rɨn-c'ok	1	#	#	kər-	1	cil	1	#	#	tol-lin-	1	#	#	ci-ɟə-bun-	1	mun-ɟi	2	#	#	tɨŋ	1	pɛ	1	p'it-ta-gu	2	cʰaŋ-	1	#	#	ka-sim	1	te-su-gi	2	#	#	si-a-ri-	1	#	#	#	#	tɛ-gɨl-p'ak	1	mo-ga-ɟi
Northern Jeolla	son	1	ø-jak	1	o-rɨn-c'ok	1	#	#	kər-	1	cil	1	#	#	tol-lin-	1	#	#	tɨ-rəp-	2	mun-ɟi	2	sal-k'ə-ɟuk	1	tɨŋ	1	pɛ	1	p'e	2	cʰaŋ-	1	#	#	ka-sim	1	ək-kɛ	1	#	#	si-a-rin-	1	#	#	#	#	tɛ-gal-p'ɛ-gi	1	mo-ga-ɟi
Southern Gyeongsang	son	1	c'ak-ɟɛ-gi	2	pa-rɨn-pjen	2	tal-ga-ɟi	1	kər-	1	cil	1	#	#	tol-lin-	1	#	#	s'uk-s'uk-	3	mun-ɟi	2	sal-k'at	1	tɨŋ	1	pɛ	1	p'ek-ta-gu	2	cʰaŋ-	1	#	#	ka-sim	1	ək-ke	1	#	#	se-a-rin-	1	#	#	#	#	tɛ-ga-ri	1	mik-s'a-ri
Northern Gyeongsang	son	1	c'ɛ-pi	2	pa-rɨn-pjen	2	tal-gu-ri	1	kər-	1	kil	1	#	#	tol-lin-	1	#	#	cʰu-ɟəp-	4	mun-ɟi	2	sal-kat	1	tɨŋ	1	pɛ	1	pi-gan-ɟi	2	cʰaŋ-	1	#	#	ka-sum	1	ək-kɛ	1	#	#	se-a-rin-	1	#	#	#	#	tɛ-ga-ri	1	mo-ga-ɟi
Southern Chungcheong	son	1	o-jət	1	o-rɨn-c'ok	1	#	#	kər-	1	kil	1	#	#	tol-lin-	1	#	#	ti-rəp-	2	tʰɨi	3	sal-kat	1	tɨŋ	1	pɛ	1	p'e	2	cʰaŋ-	1	#	#	ka-sim	1	ək-kɛ	1	#	#	si-a-rin-	1	#	#	#	#	tɛ-gal	1	mo-ga-ɟi
Northern Chungcheong	son	1	øn	1	o-rɨn-c'ok	1	#	#	kər-	1	cil	1	#	#	tol-lin-	1	#	#	#	#	tʰɨi-kəp-ɟi	3	sal-kat	1	tɨŋ	1	pɛ	1	p'ɛ	2	cʰaŋ-	1	#	#	ka-sim	1	ək-kɛ	1	#	#	si-a-rin-	1	#	#	#	#	tɛ-gal	1	mo-ga-ɟi
Gyeonggi	son	1	øn-j'at	1	o-rɨn-c'ok	1	ta-ri	1	kər-	1	kil	1	o-	1	tol-lin-	1	hə-əm-	1	tə-rəp-	2	mən-ɟi	2	sal-kat	1	tɨŋ	1	pɛ	1	p'e	2	cʰaŋ-	1	kan	1	ka-sɨm	1	ək-kɛ	1	al-	1	he-a-rin-	1	tu-rjə-wə-	2	pi	1	mə-ri	2	mo-ga-ɟi
Gangwon	son	1	øn	1	pa-rɨn-c'ok	2	tal-gu-ri	1	kər-	1	kil	1	#	#	tol-lin-	1	#	#	ti-rəp-	2	poŋ-daŋ	4	sal-kat	1	təp-tə-ki	3	pɛ	1	p'e	2	cʰaŋ-	1	#	#	ka-sim	1	ək-kɛ	1	#	#	he-a-rin-	1	#	#	#	#	tɛ-gal	1	mo-ga-ɟi
Hwanghae	son	1	#	#	#	#	tɛ-ri	1	kər-	1	kil	1	#	#	tol-lin-	1	#	#	cʰi-k'un-	4	mon-ɟi	2	#	#	twit-c'an-dɨŋ	1	pɛ	1	#	#	#	#	#	#	#	#	ək-kɛ	1	#	#	sin-	1	#	#	#	#	#	#	mo-ga-ɟi
Southern Hamgyong	son	1	#	#	#	#	#	#	kər-	1	cil	1	#	#	tol-lin-	1	#	#	cʰu-kul-	4	mun-ɟi	2	#	#	sa-di	2	pɛ	1	#	#	#	#	#	#	#	#	ək-kɛ	1	#	#	he-a-rin-	1	#	#	#	#	tɛ-gol	1	mo-ga-ɟi
Northern Hamgyong	son	1	øn	1	#	#	#	#	kər-	1	#	#	#	#	tol-gun-	1	#	#	tʰi-k'əp-	5	#	#	#	#	tɨŋ-sa-de	1 & 2	pɛ	1	#	#	#	#	#	#	#	#	ək-kɛ	1	#	#	sen-	1	#	#	#	#	ma-ri	2	mo-ga-ɟi
Southern Pyongan	son	1	#	#	#	#	tal-gɛŋ-i	1	kər-	1	kil	1	#	#	tol-lin-	1	#	#	k'e-k'in-	6	moŋ-daŋ	2	#	#	sa-di	2	pɛ	1	p'e-da-gu	2	#	#	#	#	ka-sim	1	ək-kɛ	1	#	#	#	#	#	#	#	#	#	#	mo-ga-ɟi
Northern Pyongan	son	1	#	#	#	#	#	#	kər-	1	kil	1	#	#	tol-lin-	1	hem-	1	k'e-k'in-	6	moŋ-daŋ	2	#	#	twit-c'an-dɨŋ	1	hə-buk	2	p'e-da-gu	2	#	#	#	#	#	#	ək-kɛ	1	#	#	hen-	1	#	#	#	#	#	#	mo-ga-ɟi
Middle Korean	son	1	#	#	#	#	ta-ri	1	kǝr-	1	kil	1	o-	1	tol-li-	1	hǝ-jǝm-	1	tǝ-rǝ-	2	tɨit-kɨl	3	sal-	1	tuŋ	1	#	#	spjǝ	2	ɛ	2	kan	1	ka-sam	1	ǝ-kø	1	al-	1	he-a-ri-	1	tu-rjə-	2	pi	1	mǝ-ri	2	mok
Underlined items were extracted from Nanmal Ohwi Chongbo Chori Yonguso
Middle Korean was extracted from GW Nam's collection
[truncated: 443 more columns]

## Sheet: Binary data
Jeju	1	1	0	1	0	?	1	1	?	1	?	?	?	?	?	?	?	1	0	0	0	?	1	0	0	1	0	1	0	1	0	?	1	1	0	?	1	1	0	?	1	0	1	0	1	0	1	?	?
Southern Jeolla	1	1	0	1	0	?	1	1	?	1	?	1	0	0	0	0	0	0	1	0	0	?	1	0	0	1	0	0	1	1	0	?	1	0	1	?	1	?	?	?	1	0	0	1	0	1	1	?	1
Northern Jeolla	1	1	0	1	0	?	1	1	?	1	?	0	1	0	0	0	0	0	1	0	0	1	1	0	0	1	0	0	1	1	0	?	1	1	0	?	1	?	?	?	1	0	0	1	0	1	1	?	?
Southern Gyeongsang	1	0	1	0	1	1	1	1	?	1	?	0	0	1	0	0	0	0	1	0	0	1	1	0	0	1	0	0	1	1	0	?	1	1	0	?	1	?	?	?	1	0	0	1	0	1	1	?	1
Northern Gyeongsang	1	0	1	0	1	1	1	1	?	1	?	0	0	0	1	0	0	0	1	0	0	1	1	0	0	1	0	0	1	1	0	?	1	1	0	?	1	?	?	?	1	0	0	1	0	1	1	?	1
Southern Chungcheong	1	1	0	1	0	?	1	1	?	1	?	0	1	0	0	0	0	0	0	1	0	1	1	0	0	1	0	0	1	1	0	?	1	1	0	?	1	?	?	?	1	0	0	1	0	1	1	?	1
Northern Chungcheong	1	1	0	1	0	?	1	1	?	1	?	?	?	?	?	?	?	0	0	1	0	1	1	0	0	1	0	0	1	1	0	?	1	1	0	?	1	?	?	?	1	0	0	1	0	1	1	?	1
Gyeonggi	1	1	0	1	0	1	1	1	1	1	1	0	1	0	0	0	0	0	1	0	0	1	1	0	0	1	0	0	1	1	0	1	1	1	0	1	1	0	1	1	0	1	0	1	0	1	1	1	1
Gangwon	1	1	0	0	1	1	1	1	?	1	?	0	1	0	0	0	0	0	0	0	1	1	0	0	1	1	0	0	1	1	0	?	1	1	0	?	1	?	?	?	1	0	0	1	0	1	1	?	1
Hwanghae	1	?	?	?	?	1	1	1	?	1	?	0	0	0	1	0	0	0	1	0	0	?	1	0	0	1	0	?	?	?	?	?	?	1	0	?	1	?	?	?	?	?	0	1	?	?	1	?	?
Southern Hamgyong	1	?	?	?	?	?	1	1	?	1	?	0	0	0	1	0	0	0	1	0	0	?	0	1	0	1	0	?	?	?	?	?	?	1	0	?	1	?	?	?	1	0	0	1	?	?	1	?	?
Northern Hamgyong	1	1	0	?	?	?	1	?	?	1	?	0	0	0	0	1	0	?	?	?	?	?	1	1	0	1	0	?	?	?	?	?	?	1	0	?	1	?	?	?	0	1	0	1	?	?	1	?	?
Southern Pyongan	1	?	?	?	?	1	1	1	?	1	?	0	0	0	0	0	1	0	1	0	0	?	0	1	0	1	0	0	1	?	?	?	1	1	0	?	?	?	?	?	?	?	0	1	0	1	1	?	?
Northern Pyongan	1	?	?	?	?	?	1	1	?	1	1	0	0	0	0	0	1	0	1	0	0	?	1	0	0	0	1	0	1	?	?	?	?	1	0	?	1	?	?	?	?	?	0	1	0	1	1	?	?
Middle Korean	1	?	?	?	?	1	1	1	1	1	1	0	1	0	0	0	0	0	0	1	0	1	1	0	0	?	?	0	1	0	1	1	1	1	0	1	1	0	1	1	0	1	0	1	0	1	1	1	1
[truncated: 334 more columns]

## Sheet: STRUCTURE
	1	2	3	4	5	6	7	8	9	10	11	12	13	14	15	16	17	18	19	20	21	22	23	24	25	26	27	28	29	30	31	32	33	34	35	36	37	38	39	40	41	42	43	44	45	46	47	48	49
	hand	left	right	leg	walk	road	to come	to turn	to swim	dirty	dust	skin	back	belly	bone	intestines	liver	breast	shoulder	to know, be knowledgeable	to think	to fear	blood	head	neck	hair	nose	to breathe	smell	mouth	tooth	tongue	to laugh	to cry	to vomit	to spit	to eat	to chew	to cook	to drink	to bite	to suck	ear	to hear	eye	to see	to yawn	to sleep	to lie down
Jeju	1	1	1	-9	1	1	-9	1	-9	-9	1	-9	1	1	1	1	-9	1	1	-9	1	1	-9	1	1	1	1	-9	-9	1	1	1	-9	-9	1	1	1	1	1	-9	-9	1	1	1	1	-9	1	1	1
SouthJeolla	1	1	1	-9	1	1	-9	1	-9	1	2	-9	1	1	2	1	-9	1	2	-9	1	-9	-9	1	2	2	1	-9	1	2	1	1	1	-9	2	1	1	2	1	-9	-9	1	1	1	1	-9	1	1	1
NorthJeolla	1	1	1	-9	1	1	-9	1	-9	2	2	1	1	1	2	1	-9	1	1	-9	1	-9	-9	1	2	2	1	-9	-9	2	1	1	-9	-9	-9	1	1	2	1	-9	-9	1	1	1	1	-9	1	1	1
SouthGyeongsang	1	2	2	1	1	1	-9	1	-9	3	2	1	1	1	2	1	-9	1	1	-9	1	-9	-9	1	2	2	1	-9	1	2	1	1	1	-9	3	1	1	2	1	-9	-9	1	1	1	1	-9	1	1	1
NorthGyeongsang	1	2	2	1	1	1	-9	1	-9	4	2	1	1	1	2	1	-9	1	1	-9	1	-9	-9	1	2	2	1	-9	1	2	1	1	1	-9	4	1	1	2	1	-9	-9	1	1	1	1	-9	1	1	1
SouthChungcheong	1	1	1	-9	1	1	-9	1	-9	2	3	1	1	1	2	1	-9	1	1	-9	1	-9	-9	1	2	2	1	-9	1	2	1	1	-9	-9	3	1	1	2	1	-9	-9	1	1	1	1	-9	-9	1	1
NorthChungcheong	1	1	1	-9	1	1	-9	1	-9	-9	3	1	1	1	2	1	-9	1	1	-9	1	-9	-9	1	2	2	1	-9	1	2	1	1	1	-9	3	1	1	2	1	-9	-9	1	1	1	1	-9	1	1	1
Gyeonggi	1	1	1	1	1	1	1	1	1	2	2	1	1	1	2	1	1	1	1	1	1	2	1	2	2	2	1	1	1	2	1	1	1	1	5	1	1	2	1	1	1	1	1	1	1	1	1	1	1
Gangwon	1	1	2	1	1	1	-9	1	-9	2	4	1	3	1	2	1	-9	1	1	-9	1	-9	-9	1	2	2	1	-9	1	2	1	1	1	-9	4	1	1	2	1	-9	-9	1	1	1	1	-9	-9	1	1
Hwanghae	1	-9	-9	1	1	1	-9	1	-9	4	2	-9	1	1	-9	-9	-9	-9	1	-9	1	-9	-9	-9	2	-9	1	-9	-9	2	1	1	-9	-9	-9	-9	2	-9	1	-9	-9	-9	1	1	1	-9	-9	1	-9
SouthHamgyong	1	-9	-9	-9	1	1	-9	1	-9	4	2	-9	2	1	-9	-9	-9	-9	1	-9	1	-9	-9	1	2	-9	1	-9	-9	2	1	1	-9	-9	-9	1	2	-9	1	-9	-9	-9	1	1	1	-9	-9	1	-9
NorthHamgyong	1	1	-9	-9	1	-9	-9	1	-9	5	-9	-9	-9	1	-9	-9	-9	-9	1	-9	1	-9	-9	2	2	-9	1	-9	-9	2	1	1	-9	-9	-9	1	2	-9	1	-9	-9	-9	1	1	-9	-9	-9	1	-9
SouthPyongan	1	-9	-9	1	1	1	-9	1	-9	6	2	-9	2	1	2	-9	-9	1	1	-9	-9	-9	-9	-9	2	2	1	-9	-9	2	1	1	-9	-9	5	1	2	-9	1	-9	-9	-9	1	1	-9	-9	-9	1	1
NorthPyongan	1	-9	-9	-9	1	1	-9	1	1	6	2	-9	1	2	2	-9	-9	-9	1	-9	1	-9	-9	-9	2	2	1	-9	-9	2	1	1	-9	-9	5	1	2	-9	1	-9	-9	-9	1	1	-9	-9	-9	1	-9
MiddleKorean	1	-9	-9	1	1	1	1	1	1	2	3	1	1	-9	2	2	1	1	1	1	1	2	1	2	2	2	1	1	1	2	1	1	1	1	3	1	1	2	-9	1	1	1	1	1	1	1	1	1	1
[truncated: 197 more columns]

## Sheet: Barrier
Centroids
	X	Y
Jeju	126.556	33.3854
SouthJeolla	126.977	34.9277
NorthJeolla	127.155	35.7067
SouthGyeongsang	128.395	35.3562
NorthGyeongsang	128.745	36.3047
SouthChungcheong	126.85	36.5384
NorthChungcheong	127.822	36.7142
Gyeonggi	127.115	37.5337
Gangwon	127.964	38.1239
Hwanghae	125.971	38.3374
SouthHamgyong	127.807	40.2649
NorthHamgyong	128.968	41.5992
SouthPyongan	126.148	39.3825
NorthPyongan	125.984	40.4613
Pairwise Jaccard distances
	Jeju	SouthJeolla	NorthJeolla	SouthGyeongsang	NorthGyeongsang	SouthChungcheong	NorthChungcheong	Gyeonggi	Gangwon	Hwanghae	SouthHamgyong	NorthHamgyong	SouthPyongan	NorthPyongan
Jeju	0	0.305389	0.272109	0.421622	0.403315	0.326797	0.354651	0.302198	0.417143	0.27381	0.441667	0.396396	0.366071	0.503876
SouthJeolla	0.305389	0	0.0748299	0.29798	0.311558	0.242604	0.271739	0.247525	0.315789	0.269663	0.442623	0.405172	0.315789	0.418605
NorthJeolla	0.272109	0.0748299	0	0.258824	0.264706	0.155844	0.203704	0.15625	0.27439	0.202381	0.403509	0.352381	0.266667	0.389831
SouthGyeongsang	0.421622	0.29798	0.258824	0	0.136364	0.31016	0.3125	0.276018	0.307317	0.373737	0.507353	0.472441	0.392308	0.468531
NorthGyeongsang	0.403315	0.311558	0.264706	0.136364	0	0.281768	0.278607	0.252336	0.252525	0.333333	0.449612	0.44	0.368	0.460432
SouthChungcheong	0.326797	0.242604	0.155844	0.31016	0.281768	0	0.0920245	0.145349	0.264045	0.22093	0.368421	0.321101	0.279279	0.382114
NorthChungcheong	0.354651	0.271739	0.203704	0.3125	0.278607	0.0920245	0	0.165803	0.268041	0.218391	0.350427	0.277778	0.301724	0.40458
Gyeonggi	0.302198	0.247525	0.15625	0.276018	0.252336	0.145349	0.165803	0	0.22	0.0952381	0.301587	0.241667	0.186441	0.333333
Gangwon	0.417143	0.315789	0.27439	0.307317	0.252525	0.264045	0.268041	0.22	0	0.336842	0.421875	0.367521	0.344262	0.421053
Hwanghae	0.27381	0.269663	0.202381	0.373737	0.333333	0.22093	0.218391	0.0952381	0.336842	0	0.247059	0.162162	0.128205	0.261905
SouthHamgyong	0.441667	0.442623	0.403509	0.507353	0.449612	0.368421	0.350427	0.301587	0.421875	0.247059	0	0.166667	0.258065	0.26
NorthHamgyong	0.396396	0.405172	0.352381	0.472441	0.44	0.321101	0.277778	0.241667	0.367521	0.162162	0.166667	0	0.174419	0.31
SouthPyongan	0.366071	0.315789	0.266667	0.392308	0.368	0.279279	0.301724	0.186441	0.344262	0.128205	0.258065	0.174419	0	0.178571
NorthPyongan	0.503876	0.418605	0.389831	0.468531	0.460432	0.382114	0.40458	0.333333	0.421053	0.261905	0.26	0.31	0.178571	0
