# Supplementary material for: A Sketch of Language History in the Korean Peninsula
Source: PLoS One. 2015 May 29;10(5):e0128448. doi: 10.1371/journal.pone.0128448 (PMC4449120; doi:10.1371/journal.pone.0128448)
Supplement: S1 Table — (XLSX) [file pone.0128448.s006.xlsx]

## Sheet: Sheet1
Substitution models	Clock models	Estimated marginal log-likelihoods
Covarion	Strict	-1392.21
	Relaxed	-1368.01
Single reversible rate	Strict	-1461.27
	Relaxed	-1437.69
Single reversible rate with gamma correction	Strict	-1451
	Relaxed	-1428.76
